# Supplementary figures and images for: Clinicopathological and prognostic significance of interleukin-8 expression and its relationship to KRAS mutation in lung adenocarcinoma
Source: PubMed Central journal article supplement — Br J Cancer. 2014 Feb 27;110(8):2047–53. doi: 10.1038/bjc.2014.110 (PMC3992490; doi:10.1038/bjc.2014.110), 2014-02-27

# Supplementary Fig. 1

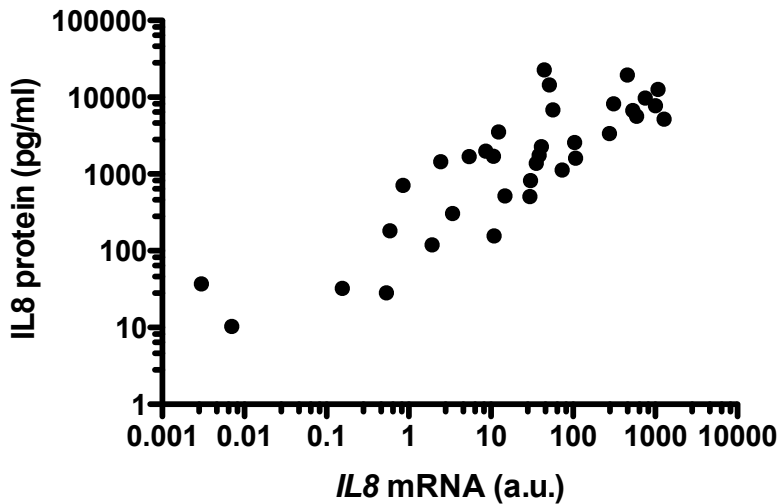

Supplement: bjc2014110x1.pdf [file bjc2014110x1.pdf]

Supplementary Fig. 2

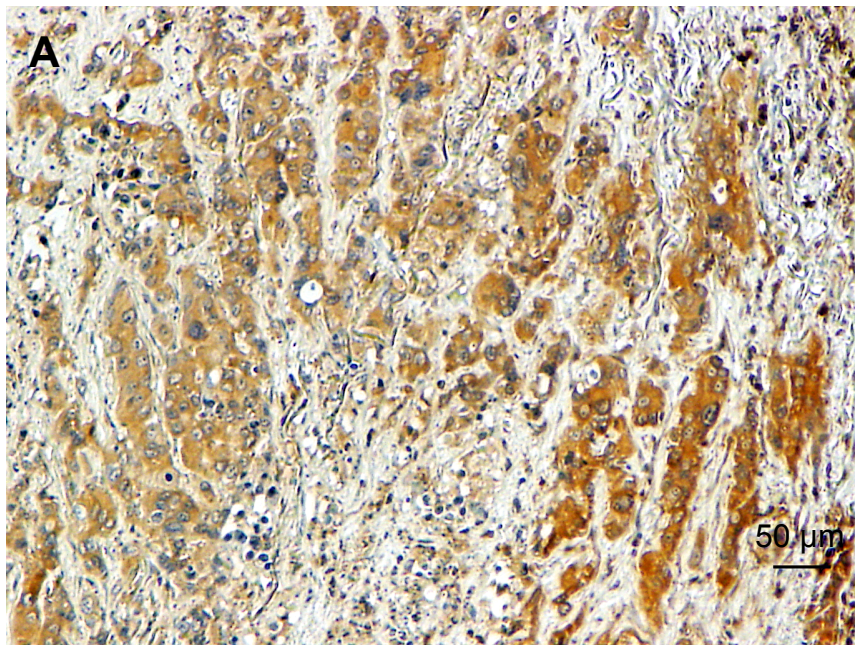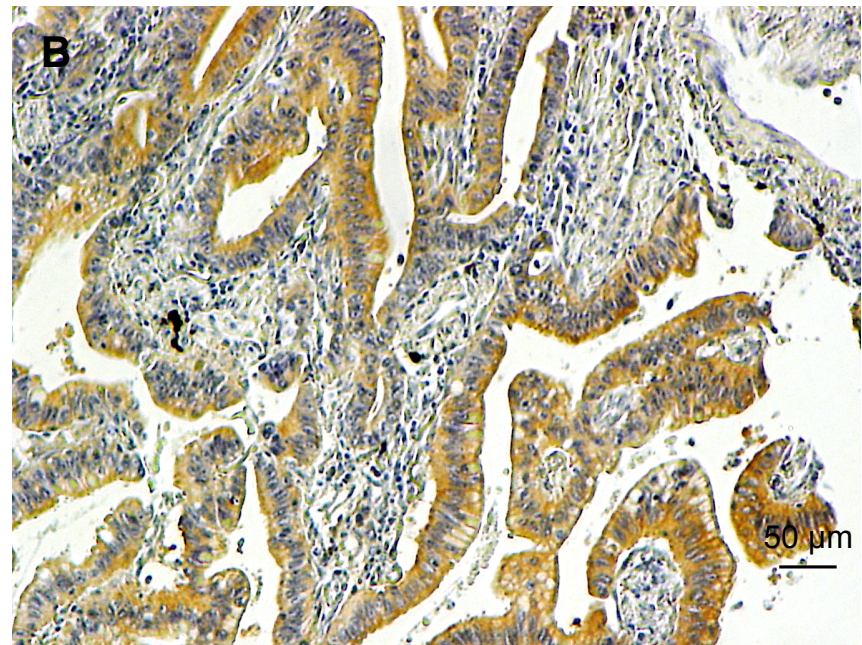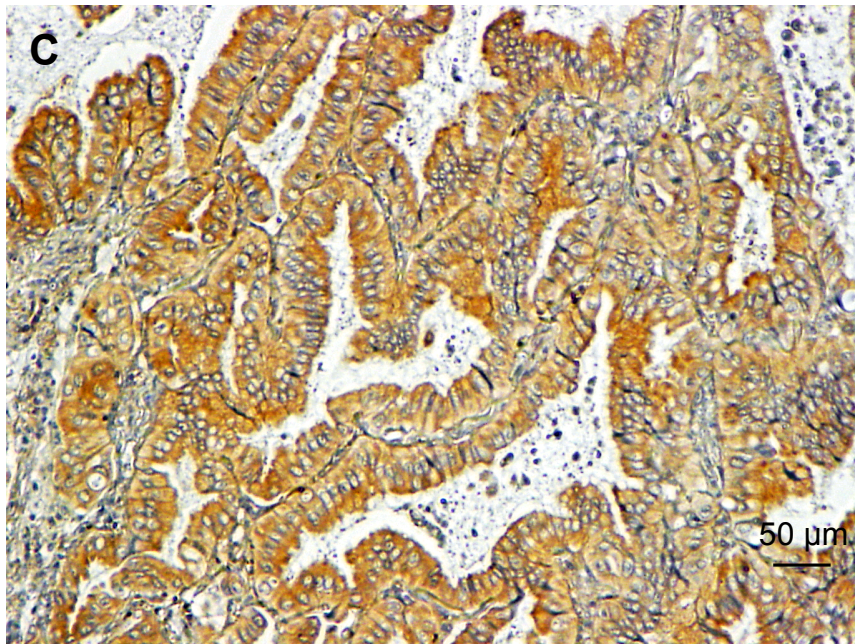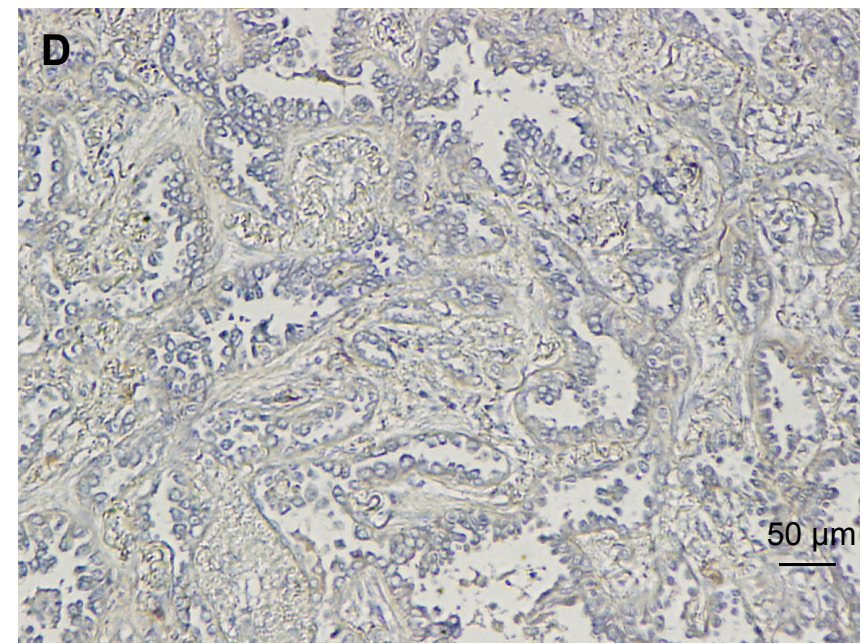

Supplement: bjc2014110x2.pdf [file bjc2014110x2.pdf]
